# Supplementary material for: Development and evaluation of a patient-centered quality indicator for the appropriateness of type 2 diabetes management
Source: PubMed Central journal article supplement — BMJ Open Diabetes Res Care. 2020 Nov 24;8(2):e001878. doi: 10.1136/bmjdrc-2020-001878 (PMC7689069; doi:10.1136/bmjdrc-2020-001878), 2020-11-24
Supplement: bmjdrc-2020-001878supp001.pdf [file bmjdrc-2020-001878supp001.pdf]

## Online-Only Supplementary Material

### Contents

|                                                                                                                                                                                  |    |
|----------------------------------------------------------------------------------------------------------------------------------------------------------------------------------|----|
| Supplementary Table 1. Appropriateness of Diabetes Therapy Indicator (ADTI) specification codes.....                                                                             | 2  |
| Supplementary Table 2. Study population.....                                                                                                                                     | 5  |
| Supplementary Table 3. Comorbidity profile of clinically complex patients in the study population .....                                                                          | 6  |
| Supplementary Table 4. Characteristics of patients designated as undertreated, appropriately treated, or overtreated by the Appropriate Diabetes Treatment Indicator (ADTI)..... | 7  |
| Supplementary Table 5. Comparison of the ADTI to existing dichotomous measures of glycemic control                                                                               | 9  |
| Supplementary Table 6. Provider-level variation in ADTI performance.....                                                                                                         | 10 |
| Supplementary Figure 1. Provider action recommendations in response to ADTI results for individual patients .....                                                                | 11 |
| Supplementary Figure 2. Glycemic targets as recommended by clinical practice guidelines. ....                                                                                    | 12 |
| References for the Online-Only Supplemental Material.....                                                                                                                        | 13 |

**Supplementary Table 1. Appropriateness of Diabetes Therapy Indicator (ADTI) specification codes.** Diagnosis codes used to ascertain health conditions used to determine clinical complexity and measure exclusion criteria.

| Health condition                             | ICD-9 codes                                                                                                                                                                                                          | ICD-10 codes                                                                                                                                                                                                                                              |
|----------------------------------------------|----------------------------------------------------------------------------------------------------------------------------------------------------------------------------------------------------------------------|-----------------------------------------------------------------------------------------------------------------------------------------------------------------------------------------------------------------------------------------------------------|
| <b>Hypoglycemia</b>                          | 251.0, 251.1, 251.2, 270.3, 962.3 or 250.8x (and not 259.8, 272.7, 681.xx, 682.xx, 686.9x, 707.1-707.9, 709.3, 730.0-730.2, 731.8)                                                                                   | E08.641, E08.649, E09.641, E09.649, E10.641, E10.649, E11.641, E11.649, E13.641, E13.649, E15, E16.0, E16.1, E16.2, T383X1A, T383X1D, T383X1S, T383X2A, T383X2D, T383X2S, T383X3A, T383X3D, T383X3S, T383X4A, T383X4D, T383X4S, T383X5A, T383X5D, T383X5S |
|                                              | <i>ICD-9 codes from Ginde, et al(1); ICD-10 codes were adapted by study investigators based on clinical expertise</i>                                                                                                |                                                                                                                                                                                                                                                           |
| <b>Dementia</b>                              | 046.1x, 290.1x, 290.2x, 290.3, 290.4x, 291.2, 292.82, 294.1x, 294.2x, 331.0, 331.1x, 331.2, 331.6, 331.82, 331.89                                                                                                    | A81.0x, F01.5x, F02.8x, F03.9x, F10.27, F10.97, F13.27, F13.97, F18.97, F19.17, F19.27, F19.97, G30.x, G31.0x, G31.1, G31.83, G31.85                                                                                                                      |
|                                              | <i>Adapted from cohort definition in NQF-endorsed quality measure "Antipsychotic Use in Persons with Dementia" and American Academy of Neurology's "Diagnosis (active) dementia group" value set (found in VSAC)</i> |                                                                                                                                                                                                                                                           |
| <b>End-stage renal disease</b>               | 585.5, 585.6, 403.01, 403.11, 403.91, 404.02, 404.03, 404.12, 404.13, 404.92, 404.93, V45.11                                                                                                                         | N18.5, N18.6, I12.0, I13.11, I13.2                                                                                                                                                                                                                        |
|                                              | <i>Investigator developed algorithm based on clinical expertise and literature review</i>                                                                                                                            |                                                                                                                                                                                                                                                           |
| <b>Chronic kidney disease, stage 3-4</b>     | 585.3, 585.4                                                                                                                                                                                                         | N18.3, N18.4                                                                                                                                                                                                                                              |
|                                              | <i>Investigator developed algorithm based on clinical expertise and literature review</i>                                                                                                                            |                                                                                                                                                                                                                                                           |
| <b>Myocardial infarction</b>                 | 410.xx, 412                                                                                                                                                                                                          | I21.xx, I22.x, I25.2                                                                                                                                                                                                                                      |
|                                              | <i>Adapted from AHRQ CCS category 100 (2)</i>                                                                                                                                                                        |                                                                                                                                                                                                                                                           |
| <b>Heart failure</b>                         | 398.91, 402.01, 402.11, 402.91, 404.01, 404.03, 404.11, 404.13, 404.91, 404.93, 428.xx                                                                                                                               | I09.81, I11.0, I13.0, I13.2, I50.xx                                                                                                                                                                                                                       |
|                                              | <i>Adapted from the cohort for the NQF-endorsed CMS "Hospital 30-day, all-cause, risk-standardized readmission rate (RSRR) following heart failure (HF) hospitalization" measure (ACO-37; NQF #0330)(3; 4)</i>       |                                                                                                                                                                                                                                                           |
| <b>Cerebrovascular disease</b>               | 430, 431, 432.x, 433.xx, 434.xx, 435.x, 436, 437.x, 438.xx, V12.54                                                                                                                                                   | G45.0, G45.1, G45.2, G45.8, G45.9, G46.x, I60.xx, I61.x (except I61.0), I62.xx, I63.xxx, I65.xx, I66.xx, I67.8x (except I67.83, I67.84), I67.9, I69.xxx, Z86.73                                                                                           |
|                                              | <i>Adapted from "Cerebrovascular disease, Stroke, TIA" value set from Quality Insights of Pennsylvania (QIP) from VSAC</i>                                                                                           |                                                                                                                                                                                                                                                           |
| <b>Chronic obstructive pulmonary disease</b> | 490, 491.xx, 492.x, 494.x, 496                                                                                                                                                                                       | J40, J41.x, J42, J43.x, J44.x, J47.x                                                                                                                                                                                                                      |
|                                              | <i>Definition taken from the chronic obstructive pulmonary disease and asthma chronic disease group in the NQF-endorsed CMS "All-Cause Unplanned Admissions for</i>                                                  |                                                                                                                                                                                                                                                           |

|                                                                   |                                                                                                                                                                         |                                                                                                                                                                                                                                         |
|-------------------------------------------------------------------|-------------------------------------------------------------------------------------------------------------------------------------------------------------------------|-----------------------------------------------------------------------------------------------------------------------------------------------------------------------------------------------------------------------------------------|
|                                                                   | <i>Patients with Multiple Chronic Conditions” measure (ACO-38)(5)</i>                                                                                                   |                                                                                                                                                                                                                                         |
| <b>Metastatic cancer</b>                                          | 196.xx, 197.xx, 198.xx                                                                                                                                                  | C77.xx, C78.xx, C79.xx                                                                                                                                                                                                                  |
|                                                                   | <i>Taken from AHRQ CCS categories 11-22; 24-43 (2)</i>                                                                                                                  |                                                                                                                                                                                                                                         |
| <b>Non-metastatic cancer</b><br>(except non-melanoma skin cancer) | 14x.xx, 15x.xx, 160.x-165.x, 170.x-172.x, 174.x-176.x, 179-189.x, 19x.xx, 200.xx-208.xx (except 196.xx, 197.xx, 198.xx, 203.x1, 204.x1, 205.x1, 206.x1, 207.x1, 208.x1) | C00.x-C14.x, C15.x-C26.x, C3x.xx, C40.xx-C41.x, C43.x, C4A.xx, C45.x-C49.xx, C50.xxx, C51.x-C58, C60.x-C63.x, C64.x-C68.x, C69.xx-C72.x, C73-C76.x, C80.x, C7A.xx, C81.xx-C96.x (except C90.x1, C91.x1, C92.x1, C93.x1, C94.x1, C95.x1) |
|                                                                   | <i>Taken from AHRQ CCS categories 11-22; 24-43 (2)</i>                                                                                                                  |                                                                                                                                                                                                                                         |
| <b>Cirrhosis</b>                                                  | 571.2, 571.5, 571.6                                                                                                                                                     | K70.3x, K74.3, K74.4, K74.5, K74.6x                                                                                                                                                                                                     |
|                                                                   | <i>Taken from “Cirrhosis” value set from MITRE (found on VSAC)</i>                                                                                                      |                                                                                                                                                                                                                                         |
| <b>Proliferative retinopathy</b>                                  | 361.xx, 362.02, 362.53, 369.xx, 379.23                                                                                                                                  | H33.xxx, E11.359x, H35.359, H54.xx, H43.1x                                                                                                                                                                                              |
|                                                                   | <i>Adapted from Glasheen, et al(6) and the NQF-endorsed CMS “Risk-Standardized Acute Admission Rates for Patients with Diabetes” measure (ACO-36) (7)</i>               |                                                                                                                                                                                                                                         |
| <b>Blindness</b>                                                  | 360.41, 360.42, 368.30, 368.31, 369.xx, 377.75                                                                                                                          | H44.51, H44.52, H47.61, H53.30, H53.34, H54.xx                                                                                                                                                                                          |
|                                                                   | <i>Investigator developed algorithm based on clinical expertise and literature review</i>                                                                               |                                                                                                                                                                                                                                         |
| <b>Peripheral neuropathy</b>                                      | 250.6x, 354.x, 355.x, 356.9, 357.2, 713.5                                                                                                                               | E10.40, E10.42, E11.40, E11.42, E13.42, G56.x, G57.x, G58.x, G60.9, M14.6x                                                                                                                                                              |
|                                                                   | <i>Adapted from Glasheen, et al(6) and the NQF-endorsed CMS “Risk-Standardized Acute Admission Rates for Patients with Diabetes” measure (ACO-36) (7)</i>               |                                                                                                                                                                                                                                         |
| <b>Lower extremity ulcers</b>                                     | 707.0x-707.2x                                                                                                                                                           | L89.xx, L97.xx,                                                                                                                                                                                                                         |
|                                                                   | <i>Investigator developed algorithm based on clinical expertise and literature review</i>                                                                               |                                                                                                                                                                                                                                         |
| <b>Amputation</b>                                                 | V49.7                                                                                                                                                                   | Z89.4x-Z89.6x                                                                                                                                                                                                                           |
|                                                                   | <i>Investigator developed algorithm based on clinical expertise and literature review</i>                                                                               |                                                                                                                                                                                                                                         |
| <b>Arthritis</b>                                                  | 711.2x, 714.xx (except 714.81), 715.xx, 720.x, 725                                                                                                                      | M05.xxx, M06.xxx, M12.0xx, M35.2, M45.x, M46.1, M46.8x, M46.9x, M49.8x, M35.3                                                                                                                                                           |
|                                                                   | <i>Taken from AHRQ CCS categories 202-203, 205 (2)</i>                                                                                                                  |                                                                                                                                                                                                                                         |
| <b>Urinary incontinence</b>                                       | 625.6, 788.30, 788.31, 788.32, 788.33, 788.34, 788.38, 788.39, 788.91                                                                                                   | N39.3, N39.41, N39.42, N39.46, N39.490, N39.492, N39.498, R32, R39.81                                                                                                                                                                   |
|                                                                   | <i>Investigator developed algorithm based on clinical expertise and literature review</i>                                                                               |                                                                                                                                                                                                                                         |
| <b>Depression</b>                                                 | 311, 290.13, 290.21, 290.43, 296.2x, 296.3x, 296.82, 298.0, 301.12, 309.0, 309.1, 309.28                                                                                | F01.51, F32.xx (except F32.81), F33.xx, F34.8x, F43.21, F43.23                                                                                                                                                                          |
|                                                                   | <i>Adapted from “Depression” value set from Quality Insights of Pennsylvania (found on VSAC)</i>                                                                        |                                                                                                                                                                                                                                         |

|              |                                                                                           |                                                                                                                                                                                                                          |
|--------------|-------------------------------------------------------------------------------------------|--------------------------------------------------------------------------------------------------------------------------------------------------------------------------------------------------------------------------|
| <b>Falls</b> | E88x.x, E987.x                                                                            | W00.xxxx, W01.xxxx, W03.xxxx,<br>W04.xxxx, W05.xxxx, W06.xxxx,<br>W07.xxxx, W08.xxxx, W09.xxxx,<br>W10.xxxx, W11.xxxx, W12.xxxx,<br>W13.xxxx, W14.xxxx, W15.xxxx,<br>W16.xxxx, W17.xxxx, W18.xxxx,<br>W19.xxxx, Y30.XXXA |
|              | <i>Investigator developed algorithm based on clinical expertise and literature review</i> |                                                                                                                                                                                                                          |

*Abbreviations:* ACO, Accountable Care Organization; CCS, Clinical Classification Software ; MI, myocardial infarction; VSAC, United States National Library of Medicine Value Set Authority Center

### Codes used for exclusion

|                                                    |                                                                                                                                                                                                                                                                                                                                                                                                                      |
|----------------------------------------------------|----------------------------------------------------------------------------------------------------------------------------------------------------------------------------------------------------------------------------------------------------------------------------------------------------------------------------------------------------------------------------------------------------------------------|
| <b>Pregnancy state</b><br>(exclusion criterion)    | ICD-9: 630.xx-679.xx, V22.x, V23.x<br>ICD-10: O00-O9A, Z33.x, Z34.x                                                                                                                                                                                                                                                                                                                                                  |
| <b>Hospice enrollment</b><br>(exclusion criterion) | Discharge status: 50, 51<br>Place of service: 34<br>UB codes: 0115, 0125, 0135, 0145, 0155, 0235, 065x<br>CPT codes: 99377, 99378<br>HCPC codes: G0182, G9473-G9479, G9475, G9687, G9688, G9690-G9694, G9700, G9702, G9707, G9709, G9710, G9713-G9715, G9718, G9720, G9723, G9725, G9740, G9741, G9758, G9760, G9761, G9768, G9802, G9805, G9809, G9819, G9857, G9860, G9861, Q5001-Q5008, Q5010, S9126, T2042-T2046 |

### Severe hyperglycemia (outcome) codes

| ICD-9 codes    | ICD-10 codes                                                                     |
|----------------|----------------------------------------------------------------------------------|
| 250.1x, 250.2x | E10.10, E10.11, E11.00, E11.01, E11.10, E11.11<br>E13.00, E13.01, E13.10, E13.11 |

**Supplementary Table 2. Study population.**

|                                | <b>High complexity<br/>(N=24,604)</b> | <b>Low complexity<br/>(N=181,675)</b> | <b>Total<br/>(N=206,279)</b> |
|--------------------------------|---------------------------------------|---------------------------------------|------------------------------|
| <b>Age group, years</b>        | 74.1 (9.8)                            | 64.3 (11.9)                           | 65.5 (12.1)                  |
| Mean (SD)                      |                                       |                                       |                              |
| 18-44                          | 171 (0.7%)                            | 10981 (6.0%)                          | 11152 (5.4%)                 |
| 45-64                          | 3995 (16.2%)                          | 75376 (41.5%)                         | 79371 (38.5%)                |
| 65-74                          | 6469 (26.3%)                          | 60617 (33.4%)                         | 67086 (32.5%)                |
| ≥75                            | 13969 (56.8%)                         | 34701 (19.1%)                         | 48670 (23.6%)                |
| <b>Sex</b>                     |                                       |                                       |                              |
| Female                         | 13874 (56.4%)                         | 88500 (48.7%)                         | 102374 (49.6%)               |
| Male                           | 10730 (43.6%)                         | 93175 (51.3%)                         | 103905 (50.4%)               |
| <b>Race/ethnicity</b>          |                                       |                                       |                              |
| White                          | 14647 (59.5%)                         | 106765 (58.8%)                        | 121412 (58.9%)               |
| Black                          | 4568 (18.6%)                          | 29375 (16.2%)                         | 33943 (16.5%)                |
| Hispanic                       | 3776 (15.3%)                          | 28971 (15.9%)                         | 32747 (15.9%)                |
| Asian                          | 1066 (4.3%)                           | 12207 (6.7%)                          | 13273 (6.4%)                 |
| Unknown/missing                | 547 (2.2%)                            | 4357 (2.4%)                           | 4904 (2.4%)                  |
| <b>U.S. region</b>             |                                       |                                       |                              |
| Midwest                        | 4370 (17.8%)                          | 30965 (17.0%)                         | 35335 (17.1%)                |
| Northeast                      | 5709 (23.2%)                          | 33893 (18.7%)                         | 39602 (19.2%)                |
| South                          | 12910 (52.5%)                         | 96879 (53.3%)                         | 109789 (53.2%)               |
| West                           | 1615 (6.6%)                           | 19938 (11.0%)                         | 21553 (10.4%)                |
| <b>Annual household income</b> |                                       |                                       |                              |
| <\$40,000                      | 11177 (45.4%)                         | 50943 (28.0%)                         | 62120 (30.1%)                |
| \$40,000-\$49,999              | 2732 (11.1%)                          | 17298 (9.5%)                          | 20030 (9.7%)                 |
| \$50,000-\$59,999              | 2102 (8.5%)                           | 16033 (8.8%)                          | 18135 (8.8%)                 |
| \$60,000-\$74,999              | 2359 (9.6%)                           | 20181 (11.1%)                         | 22540 (10.9%)                |
| \$75,000-\$99,999              | 2456 (10.0%)                          | 25867 (14.2%)                         | 28323 (13.7%)                |
| ≥\$100,000                     | 2583 (10.5%)                          | 44740 (24.6%)                         | 47323 (22.9%)                |
| Unknown                        | 1195 (4.9%)                           | 6613 (3.6%)                           | 7808 (3.8%)                  |
| <b>Attributed provider</b>     |                                       |                                       |                              |
| Family medicine                | 10291 (41.8%)                         | 87619 (48.2%)                         | 97910 (47.5%)                |
| Internal medicine              | 12055 (49.0%)                         | 77734 (42.8%)                         | 89789 (43.5%)                |
| Endocrinology                  | 713 (2.9%)                            | 8876 (4.9%)                           | 9589 (4.6%)                  |
| Unattributed                   | 1545 (6.3%)                           | 7446 (4.1%)                           | 8991 (4.4%)                  |
| <b>Health plan</b>             |                                       |                                       |                              |
| Commercial                     | 1956 (7.9%)                           | 79800 (43.9%)                         | 81756 (39.6%)                |
| Medicare Advantage             | 22648 (92.1%)                         | 101875 (56.1%)                        | 124523 (60.4%)               |

**Supplementary Table 3. Comorbidity profile of clinically complex patients in the study population.** One patient could meet several criteria for clinical complexity.

|                                  | <b>Clinically Complex</b><br>(N=24,604) |
|----------------------------------|-----------------------------------------|
| <b>Severe hypoglycemia</b>       | 1305 (5.3%)                             |
| <b>Dementia</b>                  | 4231 (17.2%)                            |
| <b>ESRD</b>                      | 2657 (10.8%)                            |
| <b>Metastatic cancer</b>         | 1220 (5.0%)                             |
| <b>≥ 4 chronic conditions</b>    | 18984 (77.2%)                           |
| Age ≥75 years                    | 13969 (56.8%)                           |
| Myocardial infarction            | 3478 (14.1%)                            |
| Heart failure                    | 9122 (37.1%)                            |
| Cerebrovascular disease          | 9142 (37.2%)                            |
| COPD                             | 9213 (37.4%)                            |
| Stage 3-4 chronic kidney disease | 8665 (35.2%)                            |
| Cancer                           | 5850 (23.8%)                            |
| Arthritis                        | 11326 (46.0%)                           |
| Urinary incontinence             | 3010 (12.2%)                            |
| Falls                            | 3030 (12.3%)                            |
| Depression                       | 6630 (26.9%)                            |
| Cirrhosis                        | 619 (2.5%)                              |
| Retinopathy, blindness           | 1898 (7.7%)                             |
| Neuropathy, ulcers, amputation   | 13835 (56.2%)                           |

**Supplementary Table 4. Characteristics of patients designated as undertreated, appropriately treated, or overtreated by the Appropriate Diabetes Treatment Indicator (ADTI). All percentages are calculated across rows.**

|                            | Potentially Undertreated<br>(N=43,532) | Appropriate<br>(N=147,434) | Potentially Overtreated<br>(N=15,313) | p-value |
|----------------------------|----------------------------------------|----------------------------|---------------------------------------|---------|
| <b>Primary provider</b>    |                                        |                            |                                       | <0.001  |
| Internal Medicine          | 17797 (19.8%)                          | 65397 (72.8%)              | 6595 (7.3%)                           |         |
| Family Medicine            | 21827 (22.3%)                          | 69095 (70.6%)              | 6988 (7.1%)                           |         |
| Endocrinology              | 1947 (20.3%)                           | 6671 (69.6%)               | 971 (10.1%)                           |         |
| Other                      | 1961 (21.8%)                           | 6271 (69.7%)               | 759 (8.4%)                            |         |
| <b>Health plan</b>         |                                        |                            |                                       | <0.001  |
| Commercial                 | 22315 (27.3%)                          | 54467 (66.6%)              | 4974 (6.1%)                           |         |
| Medicare Advantage         | 21217 (17.0%)                          | 92967 (74.7%)              | 10339 (8.3%)                          |         |
| <b>Clinical complexity</b> |                                        |                            |                                       | <0.001  |
| Low                        | 41007 (22.6%)                          | 131118 (72.2%)             | 9550 (5.3%)                           |         |
| High                       | 2525 (10.3%)                           | 16316 (66.3%)              | 5763 (23.4%)                          |         |
| <b>Age group</b>           |                                        |                            |                                       | <0.001  |
| 18-44 years                | 3622 (32.5%)                           | 6661 (59.7%)               | 869 (7.8%)                            |         |
| 45-64 years                | 21206 (26.7%)                          | 53035 (66.8%)              | 5130 (6.5%)                           |         |
| 65-74 years                | 12237 (18.2%)                          | 50176 (74.8%)              | 4673 (7.0%)                           |         |
| ≥75 years                  | 6467 (13.3%)                           | 37562 (77.2%)              | 4641 (9.5%)                           |         |
| <b>Gender</b>              |                                        |                            |                                       | <0.001  |
| Male                       | 23440 (22.6%)                          | 72795 (70.1%)              | 7670 (7.4%)                           |         |
| Female                     | 20092 (19.6%)                          | 74639 (72.9%)              | 7643 (7.5%)                           |         |
| <b>Race</b>                |                                        |                            |                                       | <0.001  |
| White                      | 23765 (19.6%)                          | 88050 (72.5%)              | 9597 (7.9%)                           |         |
| Black                      | 8032 (23.7%)                           | 23269 (68.6%)              | 2642 (7.8%)                           |         |
| Hispanic                   | 8263 (25.2%)                           | 22410 (68.4%)              | 2074 (6.3%)                           |         |
| Asian                      | 2527 (19.0%)                           | 10077 (75.9%)              | 669 (5.0%)                            |         |
| Unknown                    | 945 (19.3%)                            | 3628 (74.0%)               | 331 (6.7%)                            |         |
| <b>Region</b>              |                                        |                            |                                       | <0.001  |
| Midwest                    | 6938 (19.6%)                           | 25337 (71.7%)              | 3060 (8.7%)                           |         |
| Northeast                  | 7639 (19.3%)                           | 29194 (73.7%)              | 2769 (7.0%)                           |         |
| South                      | 23798 (21.7%)                          | 77929 (71.0%)              | 8062 (7.3%)                           |         |
| West                       | 5157 (23.9%)                           | 14974 (69.5%)              | 1422 (6.6%)                           |         |
| <b>Income</b>              |                                        |                            |                                       | <0.001  |
| <\$40,000                  | 12309 (19.8%)                          | 44695 (71.9%)              | 5116 (8.2%)                           |         |
| \$40,000-\$49,999          | 4304 (21.5%)                           | 14224 (71.0%)              | 1502 (7.5%)                           |         |
| \$50,000-\$59,999          | 4012 (22.1%)                           | 12900 (71.1%)              | 1223 (6.7%)                           |         |
| \$60,000-\$74,999          | 4950 (22.0%)                           | 15986 (70.9%)              | 1604 (7.1%)                           |         |

---

|                   |              |               |             |
|-------------------|--------------|---------------|-------------|
| \$75,000-\$99,999 | 6318 (22.3%) | 20067 (70.9%) | 1938 (6.8%) |
| ≥\$100,000        | 9854 (20.8%) | 34186 (72.2%) | 3283 (6.9%) |
| Unknown           | 1785 (22.9%) | 5376 (68.9%)  | 647 (8.3%)  |

---



**Supplementary Table 5. Comparison of the ADTI to existing dichotomous measures of glycemic control.** Current quality measures of glycemic control apply a uniform dichotomous threshold of HbA<sub>1c</sub> <8.0% to all adults ages 18-75. This table compares the proportion of patients deemed appropriately treated by the Appropriate Diabetes Treatment Indicator (ADTI) versus existing dichotomous measure for all patients, patients ≥18 to ≤75 years, and patients >75 years. Percent patients undertreated, appropriately treated, and overtreated are calculated across rows, by HbA<sub>1c</sub> level.

|                         | Number of patients | Potentially Undertreated | Appropriately Treated | Potentially Overtreated |
|-------------------------|--------------------|--------------------------|-----------------------|-------------------------|
| <b>Overall</b>          |                    |                          |                       |                         |
| < 8%                    | 159,855            | 11,495 (7.2%)            | 133,047 (83.2%)       | 15,313 (9.6%)           |
| ≥ 8%                    | 46,424             | 32,037 (69.0%)           | 14,387 (31.0%)        | --                      |
| <b>≥18 to ≤75 years</b> |                    |                          |                       |                         |
| < 8%                    | 123,406            | 9541 (7.7%)              | 102,657 (83.2%)       | 11,208 (9.1%)           |
| ≥ 8%                    | 40,378             | 28,476 (70.5%)           | 11,902 (29.5%)        | --                      |
| <b>&gt;75 years</b>     |                    |                          |                       |                         |
| < 8%                    | 36,449             | 1954 (5.4%)              | 30,390 (83.4%)        | 4105 (11.3%)            |
| ≥ 8%                    | 6046               | 3561 (58.9%)             | 2485 (41.1%)          | --                      |

**Supplementary Table 6. Provider-level variation in ADTI performance.** The proportions of internal medicine, family medicine, and endocrinology specialists whose attributed patients are potentially undertreated, appropriately treated, and potentially overtreated. Data presented as median and interquartile range (Q1, Q3) and calculated only for clinicians with  $\geq 25$  attributed patients.

|                                 | <b>Internal Medicine<br/>(N=270)</b> | <b>Family Medicine<br/>(N=224)</b> | <b>Endocrinology<br/>(N=16)</b> | <b>P-value</b> |
|---------------------------------|--------------------------------------|------------------------------------|---------------------------------|----------------|
| <b>Appropriately treated</b>    | 77.0% (71.0 - 84.0)                  | 74.3% (67.9 - 80.6)                | 71.5% (67.8 - 82.7)             | 0.002          |
| <b>Potentially undertreated</b> | 15.4% (9.4 - 21.2)                   | 18.5% (11.1 - 25.0)                | 13.6% (5.7 - 18.1)              | 0.001          |
| <b>Potentially overtreated</b>  | 6.6% (3.1 - 10.3)                    | 6.9% (3.7 - 10.3)                  | 11.0% (7.1 - 16.1)              | <0.001         |

**Supplementary Figure 1. Provider action recommendations in response to ADTI results for individual patients.**

| <b>Potentially Undertreated</b><br>Steps Toward Intensification                                                                                                                                                                                                                                                                                                                                                                                                                                                                                                                                                                                                                                                                                                                                                                                                                                                                                                                                                                                                                                                                                                                                                                                                                                                                                                                                                                                                    | <b>Appropriately Treated</b><br>Maintenance Therapy                                                                                                                                                                                                                                                                                                                                                                                                                                                                                                                                                                                                                                                                                                                                                                                                                                                                                                                                                                                                                                                                                                                                   | <b>Potentially Overtreated</b><br>Steps Toward De-intensification                                                                                                                                                                                                                                                                                                                                                                                                                                                                                                                                                                                                                                                                                                                                                                                                          |
|--------------------------------------------------------------------------------------------------------------------------------------------------------------------------------------------------------------------------------------------------------------------------------------------------------------------------------------------------------------------------------------------------------------------------------------------------------------------------------------------------------------------------------------------------------------------------------------------------------------------------------------------------------------------------------------------------------------------------------------------------------------------------------------------------------------------------------------------------------------------------------------------------------------------------------------------------------------------------------------------------------------------------------------------------------------------------------------------------------------------------------------------------------------------------------------------------------------------------------------------------------------------------------------------------------------------------------------------------------------------------------------------------------------------------------------------------------------------|---------------------------------------------------------------------------------------------------------------------------------------------------------------------------------------------------------------------------------------------------------------------------------------------------------------------------------------------------------------------------------------------------------------------------------------------------------------------------------------------------------------------------------------------------------------------------------------------------------------------------------------------------------------------------------------------------------------------------------------------------------------------------------------------------------------------------------------------------------------------------------------------------------------------------------------------------------------------------------------------------------------------------------------------------------------------------------------------------------------------------------------------------------------------------------------|----------------------------------------------------------------------------------------------------------------------------------------------------------------------------------------------------------------------------------------------------------------------------------------------------------------------------------------------------------------------------------------------------------------------------------------------------------------------------------------------------------------------------------------------------------------------------------------------------------------------------------------------------------------------------------------------------------------------------------------------------------------------------------------------------------------------------------------------------------------------------|
| <ol style="list-style-type: none"> <li><b>1. Assess for barriers to therapy</b> <ul style="list-style-type: none"> <li>• Medication adherence</li> <li>• Costs</li> <li>• Hypoglycemia</li> <li>• Medication side effects</li> <li>• Fear of hypoglycemia</li> <li>• Diabetes distress</li> <li>• Depression</li> <li>• Treatment burden</li> <li>• Poor health literacy</li> <li>• Prioritization of other health conditions</li> <li>• Prioritization of non-clinical needs</li> <li>• Social or socioeconomic factors</li> </ul> </li> <li><b>2. Enhance patient support</b> <ul style="list-style-type: none"> <li>• DSMES</li> <li>• Referral to pharmacist, social worker, dietician, community health worker, etc.</li> </ul> </li> <li><b>3. Reaffirm importance of lifestyle management</b></li> <li><b>4. Encourage glucose-monitoring</b><br/><i>(if treated with hypoglycemia-prone medications, experiencing symptoms suggestive of hypoglycemia or hyperglycemia, or if doing so would improve adherence or motivation)</i></li> <li><b>5. Consider alternative treatment options to address barriers to therapy</b>, changing to non-hypoglycemia prone medications, less costly medications, medications with different side effect profiles</li> <li><b>6. Intensify pharmacotherapy</b>, choosing medication(s) with maximal benefits and least harmful side effect profiles</li> <li><b>7. Reassess glycemic control in 3 months</b></li> </ol> | <ol style="list-style-type: none"> <li><b>1. Screen for complications of therapy</b> <ul style="list-style-type: none"> <li>• Medication adherence</li> <li>• Costs</li> <li>• Hypoglycemia</li> <li>• Medication side effects</li> <li>• Fear of hypoglycemia</li> <li>• Diabetes distress</li> <li>• Depression</li> <li>• Treatment burden</li> <li>• Health literacy</li> <li>• Other dominant health conditions</li> <li>• Dominant non-clinical needs</li> <li>• Social or socioeconomic factors</li> </ul> </li> <li><b>2. Offer additional support</b> <ul style="list-style-type: none"> <li>• DSMES</li> <li>• Referral to pharmacist, social worker, dietician, community health worker, etc.</li> </ul> </li> <li><b>3. Reaffirm importance of lifestyle management</b></li> <li><b>4. Encourage glucose-monitoring</b><br/><i>(if treated with hypoglycemia-prone medications, experiencing symptoms suggestive of hypoglycemia or hyperglycemia, or if doing so would improve adherence or motivation)</i></li> <li><b>5. Consider alternative treatment options to address barriers to therapy</b></li> <li><b>6. Reassess glycemic control in 6 months</b></li> </ol> | <ol style="list-style-type: none"> <li><b>1. Screen for barriers to de-intensification</b> <ul style="list-style-type: none"> <li>• Hyperglycemia</li> <li>• Fear of hyperglycemia</li> <li>• Diabetes distress</li> <li>• Poor health literacy</li> <li>• Social or socioeconomic factors</li> </ul> </li> <li><b>2. Offer additional support</b> <ul style="list-style-type: none"> <li>• DSMES</li> <li>• Referral to pharmacist, social worker, dietician, community health worker, etc.</li> </ul> </li> <li><b>1. Identify drug(s) for discontinuation</b> <ul style="list-style-type: none"> <li>• Prioritize stopping drugs with risk for hypoglycemia or other side effects, or with high cost or treatment burden</li> </ul> </li> <li><b>2. Reaffirm importance of lifestyle management</b></li> <li><b>3. Reassess glycemic control in 3 months</b></li> </ol> |

**Supplementary Figure 2. Glycemic targets as recommended by clinical practice guidelines.** Summary of recommendations provided in the 2017 U.S. Department of Veterans Affairs/ Department of Defense (VA/DoD) and 2020 American Diabetes Association (ADA) clinical practice guidelines.

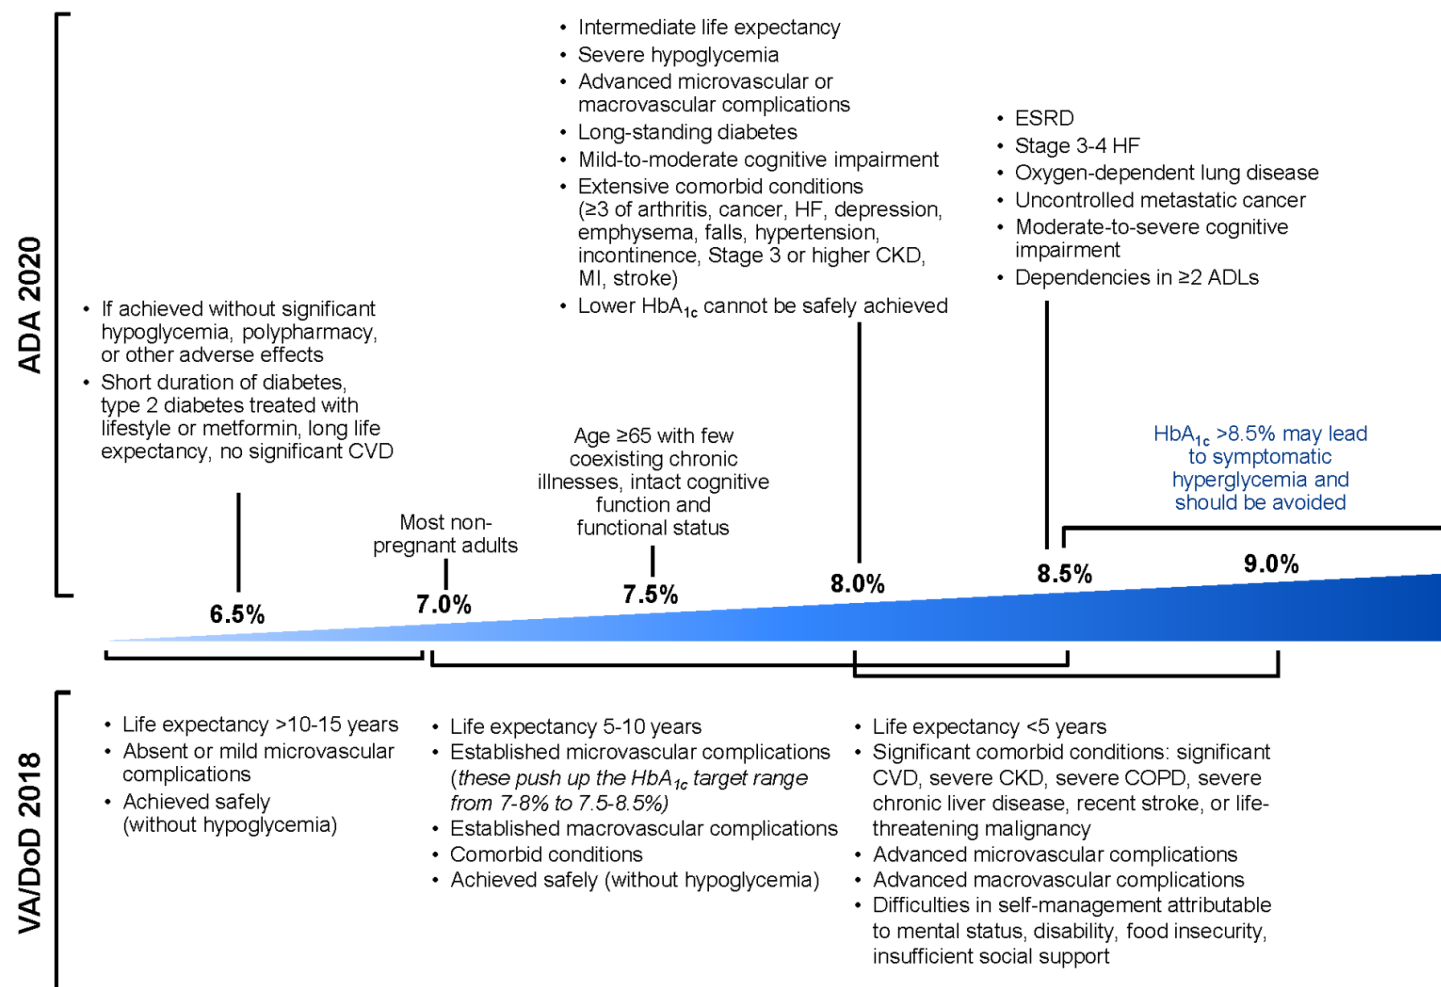

### References for the Online-Only Supplemental Material

1. Ginde AA, Blanc PG, Lieberman RM, Camargo CA, Jr.: Validation of ICD-9-CM coding algorithm for improved identification of hypoglycemia visits. *BMC Endocr Disord* 2008;8:4
2. Clinical Classifications Software (CCS), 2015 [article online], 2016. Available from <http://www.hcup-us.ahrq.gov/toolssoftware/ccs/ccs.jsp>. Accessed September 5 2018
3. NQF #0330 Centers for Medicare & Medicaid Services (CMS) "Hospital 30-day, all-cause, risk-standardized readmission rate (RSRR) following heart failure (HF) hospitalization" measure [article online], 2018. Available from <http://www.qualityforum.org/>. Accessed September 7 2018
4. Accountable Care Organization (ACO) #37 Risk-Standardized Acute Admission Rates for Patients With Heart Failure. Version 2.0 [article online], 2015. Available from <https://www.cms.gov/Medicare/Medicare-Fee-for-Service-Payment/sharedsavingsprogram/Downloads/ACO-37.pdf>. Accessed September 7 2018
5. Accountable Care Organization (ACO) #38 Risk-Standardized Acute Admission Rates for Patients With Multiple Chronic Conditions. Version 2.0 [article online], 2015. Available from <https://www.cms.gov/Medicare/Medicare-Fee-for-Service-Payment/sharedsavingsprogram/Downloads/ACO-38.pdf>. Accessed September 7 2018
6. Glasheen WP, Renda A, Dong Y: Diabetes Complications Severity Index (DCSI)-Update and ICD-10 translation. *J Diabetes Complications* 2017;31:1007-1013
7. Accountable Care Organization (ACO) #36 Risk-Standardized Acute Admission Rates for Patients With Diabetes [article online], 2015. Available from <https://www.cms.gov/Medicare/Medicare-Fee-for-Service-Payment/sharedsavingsprogram/Downloads/ACO-36.pdf>. Accessed September 5 2018
